# Supplementary material
Source: publisher figshare collection journal article supplement (https://acs.figshare.com/ndownloader/files/19195961)
Supplement: Supplementary file 1 [file 19195961]

Supporting Information

## **Gene Circuit Compartment on Nano-interface Facilitates Cascade Gene Expression**

Xiaocui Guo<sup>1</sup>‡, Feng Li<sup>1</sup>‡, Lihui Bai<sup>1</sup>, Wenting Yu<sup>1</sup>, Xue Zhang<sup>1</sup>, Yi Zhu<sup>1</sup>, and Dayong Yang<sup>1\*</sup>

<sup>1</sup>Frontier Science Center for Synthetic Biology, Key Laboratory of Systems Bioengineering (MOE), School of Chemical Engineering and Technology, Tianjin University, Tianjin, 300350, P.R. China.

E-mail: dayong.yang@tju.edu.cn

‡These authors contributed equally.

## Table of Contents

### Experimental section

Materials

T7 RNAP expression cassette sequence

eGFP expression cassette sequence

Synthesis of AuNPs

TEM

Synthesis of 2S-branched primers

Melting curve analysis

Preparation of *E. coli* BL21 extracts

Spatial distance between two genes in free gene circuit system

Oligonucleotides

### Results and discussion

Formation of 2S-branched DNA and schemes of synthesizing 2S-genes

Characterizations of the synthesized AuNPs

Synthesis of AuNP@gene circuit

Optimization of IPTG concentration

Influences of free AuNPs on cell-free system

Construction of AuNP@gene circuit with different stoichiometric ratios of 2S-eGFP genes to AuNPs

Effects of gene compartment on cascade gene expression with different concentration of genes

### References

## EXPERIMENTAL SECTION

### Materials

pQE-T7 RNAP plasmid and pRset5d-eGFP plasmid were preserved in our lab. Oligonucleotides were synthesized by GENEWIZ (Beijing, China), Hydrogen tetrachloroaurate hydrate ( $\text{HAuCl}_4 \cdot 4\text{H}_2\text{O}$ ) was from Sinopharm Chemical Reagent Co., Ltd. (Beijing, China), Sodium citrate was purchased from Solarbio, L-ascorbic acid was purchased from Dingguo changsheng biotechnology (Beijing, China), 2×Pfu PCR MasterMix, TIANquick Midi Purification Kit (DP204) and DNA marker were purchased from TIANGEN (Beijing, China), 4',5',8'-trimethypsoralen was from ThermoFisher. *E.coli BL21* extract and feeding solution were prepared by us.

### T7 RNAP expression cassette sequence (highlight segment is T7 RNAP gene sequence).

ATAGGGGTTCCGCGCACATTTCCCGAAAAGTGCCACCTGACGTCTAAGAAACCATTATTATCATGACATTAA  
CCTATAAAAATAGGCGTATCACGAGGCCCTTTCGTCTTCACCTCGAGAAATCATAAAAAATTTATTTGCTTTGT  
GAGCGGATAACAATTATAATAGATTCAATTGTGAGCGGATAACAATTTACACAGAATTCATTAAAGAGGAGA  
AATTA ACTATGAGAGGATCGCATCACCATCACCATCACGGATCCGCATGCGAGCATGAACACGATTAACATC  
GCTAAGAACGACTTCTCTGACATCGAACTGGCTGCTATCCCGTTCAACACTCTGGCTGACCATTACGGTGAG  
CGTTTAGCTCGCGAACAGTTGGCCCTTGAGCATGAGTCTTACGAGATGGGTGAAGCACGCTTCCGCAAGAT  
GTTTGAGCGTCAACTTAAAGCTGGTGAGGTTGCGGATAACGCTGCCGCCAAGCCTCTCATCACTACCCTACT  
CCCTAAGATGATTGCACGCATCAACGACTGGTTTGAGGAAGTGAAAGCTAAGCGCGGCAAGCGCCCGACAG  
CCTTCCAGTTCCTGCAAGAAATCAAGCCGGAAGCCGTAGCGTACATCACCATTAAGACCACTCTGGCTTGCC  
TAACCACTGCTGACAATAACAACCGTTCAGGCTGTAGCAAGCGCAATCGGTGCGGCCATTGAGGACGAGGCT  
CGCTTCGGTCGTATCCGTGACCTTGAAGCTAAGCACTTCAAGAAAAACGTTGAGGAACAACCTCAACAAGCGC  
GTAGGGCACGTCTACAAGAAAGCATTTATGCAAGTTGTGAGGCTGACATGCTCTCTAAGGGTCTACTCGGT  
GGCGAGGCGTGCTTTCGTGGCATAAGGAAGACTCTATTCATGTAGGAGTACGCTGCATCGAGATGCTCAT  
TGAGTCAACCGGAATGGTTAGCTTACACCGCCAAAATGCTGGCGTAGTAGGTCAAGACTCTGAGACTATCGA  
ACTCGCACCTGAATACGCTGAGGCTATCGCAACCCGTGCAGGTGCGCTGGCTGGCATCTCTCCGATGTTCC  
AACCTTGCGTAGTTCCTCCTAAGCCGTGGACTGGCATTACTGGTGGTGGCTATTGGGCTAACGGTCGTCGT  
CCTCTGGCGCTGGTGCGTACTCACAGTAAGAAAGCACTGATGCGCTACGAAGACGTTTACATGCCTGAGGT  
GTACAAAGCGATTAAACATTGCGCAAAACACCGCATGGAAAATCAACAAGAAAGTCCTAGCGGTGCGCAACGT  
AATCACCAAGTGGAAGCATTGTCCGGTCGAGGACATCCCTGCGATTGAGCGTGAAGAACTCCCGATGAAAC  
CGGAAGACATCGACATGAATCCTGAGGCTCTACCGCGTGGAACGTGCTGCCGCTGCTGTGTACCGCAAG  
GACAAGGCTCGCAAGTCTCGCCGTATCAGCCTTGAGTTCATGCTTGAGCAAGCCAATAAGTTTGCTAACCAT

AAGGCCATCTGGTTCCTTACAACATGGACTGGCGCGGTCTGTGTTACGCTGTGTCAATGTTCAACCCGCAA  
 GGTAACGATATGACCAAAGGACTGCTTACGCTGGCGAAAGGTAAACCAATCGGTAAGGAAGGTTACTACTG  
 GCTGAAAATCCACGGTGCAAACGTGTGCGGGTGTGCGATAAGGTTCCGTTCCCTGAGCGCATCAAGTTCATTGA  
 GGAAAACCACGAGAACATCATGGCTTGCGCTAAGTCTCCACTGGAGAACACTTGGTGGGCTGAGCAAGATT  
 CTCCGTTCTGCTTCCTTGCGTTCTGCTTTGAGTACGCTGGGGTACAGCACCACGGCCTGAGCTATAACTGCT  
 CCCTTCCGCTGGCGTTTGACGGGTCTTGCTCTGGCATCCAGCACTTCTCCGCGATGCTCCGAGATGAGGTA  
 GGTGGTCGCGCGGTAACTTGCTTCCTAGTGAAACCGTTCAGGACATCTACGGGATTGTTGCTAAGAAAGTC  
 AACGAGATTCTACAAGCAGACGCAATCAATGGGACCGATAACGAAGTAGTTACCGTGACCGATGAGAACACT  
 GGTGAAATCTCTGAGAAAGTCAAGCTGGGCACTAAGGCACTGGCTGGTCAATGGCTGGCTTACGGTGTTAC  
 TCGCAGTGTGACTAAGCGTTCAGTCATGACGCTGGCTTACGGGTCCAAAGAGTTCGGCTTCCGTCAACAAG  
 TGCTGGAAGATACCATTCAGCCAGCTATTGATTCCGGCAAGGGTCTGATGTTCACTCAGCCGAATCAGGCTG  
 CTGGATACATGGCTAAGCTGATTTGGGAATCTGTGAGCGTGACGGTGGTAGCTGCGGTTGAAGCAATGAAC  
 TGGCTTAAGTCTGCTGCTAAGCTGCTGGCTGCTGAGGTCAAAGATAAGAAGACTGGAGAGATTCTTCGCAAG  
 CGTTGCGCTGTGCATTGGGTAACCTCTGATGGTTTCCCTGTGTGGCAGGAATACAAGAAGCCTATTACAGACG  
 CGCTTGAACCTGATGTTCCCTCGGTCAGTTCCGCTTACAGCCTACCATTAACACCAACAAAGATAGCGAGATT  
 GATGCACACAAACAGGAGTCTGGTATCGCTCCTAACTTTGTACACAGCCAAGACGGTAGCCACCTTCGTAAG  
 ACTGTAGTGTGGGCACACGAGAAGTACGGAATCGAATCTTTTGCCTGATTACGACTCCTTCGGTACCATT  
 CCGGCTGACGCTGCGAACCTGTTCAAAGCAGTGCGCGAACTATGGTTGACACATATGAGTCTTGTGATGTA  
 CTGGCTGATTTCTACGACCAGTTCGCTGACCAGTTGCACGAGTCTCAATTGGACAAAATGCCAGCACTTCCG  
 GCTAAAGGTAACCTGAACCTCCGTGACATCTTAGAGTCGGACTTCGCGTTTCGCGTAATCGGTACCCCGGGT  
 CGACCTGCAGCCAAGCTTAATTAGCTGAGCTTGGACTCCTGTTGATAGATCCAGTAATGACCTCAGAACTCC  
 ATCTGGATTTGTTTCAGAACGCTCGGTTGCCGCCGGGCGTTTTTTATTGGTGAGAATCCAAGCTAGCTTGGCG  
 AGATTTTCAGGAGCTA

**eGFP expression cassette sequence (highlight segment is eGFP gene sequence).**

TAACCGTATTACCGCCTTTGAGT<sup>AGCTGATACCGCTCGCCGCAGCCGAACGACCGAGCGCAGCGAGTCAG</sup>  
 TGAGCGAGGAAGCGGAAGAGCGCCCAATACGCAAACCGCCTCTCCCCGCGCGTTGGCCGATTCATTAATG  
 CAGGATCTCGATCCCGCGAAATTAATACGACTCACTATAGGGAGACCACAACGGTTTTCCCTCTAGAAATAAT  
 TTTGTTTAACTTTAAGAAGGAGATATACCATGGAGCTTTTCACTGGCGTTGTTCCCATCCTGGTCGAGCTGGA  
 CGGCGACGTAAACGGCCACAAGTTCAGCGTGTCCGGCGAGGGCGAGGGCGATGCCACCTACGGCAAGCT  
 GACCCTGAAGTTCATCTGCACCACCGGCAAGCTGCCCGTGCCCTGGCCCACCCTCGTGACCACCCTGACCT  
 ACGGCGTGCAGTGCTTCAGCCGCTACCCCGACCACATGAAGCAGCACGACTTCTTCAAGTCCGCCATGCCC

GAAGGCTACGTCCAGGAGCGCACCATCTTCTTCAAGGACGACGGCAACTACAAGACCCGCGCCGAGGTGA  
 AGTTCGAGGGGCGACACCCTGGTGAACCGCATCGAGCTGAAGGGCATCGACTTCAAGGAGGACGGCAACAT  
 CCTGGGGCACAAGCTGGAGTACAACCTACAACAGCCACAACGTCTATATCATGGCCGACAAGCAGAAGAACG  
 GCATCAAGGTGAACTTCAAGATCCGCCACAACATCGAGGACGGCAGCGTGCAGCTCGCCGACCACTACCA  
 GCAGAACACCCCCATCGGCGACGGCCCCGTGCTGCTGCCCCGACAACCACTACCTGAGCACCCAGTCCGCC  
 CTGAGCAAAGACCCCAACGAGAAGCGCGATCACATGGTCCTGCTGGAGTTCGTGACCGCCGCCGGGATCT  
 AACTCGAGTAGTAGAACTCTCTCAACGTGTACGCCATAGCTAGCTACAACCTCTCTCAACGTAACGTACCTAAC  
 GCATCGAACTCTCTCAACGTTACTATACTAACTACCTAACTCTCTCAACGTACTACTGGAAAACCTACCTGAA  
 TTCGAAGCTTGATCCGGCTGCTAACAAAGCCCGAAAGGAAGCTGAGTTGGCTGCTGCCACCGCTGAGCAAT  
 AACTAGCATAACCCCTTGGGGCCTCTAAACGGGTCTTGAGGGGTTTTTTGCTGAAAGGAGGAACCTATATCCG  
 GATCTGGCGTAATAGCGAAGAGGCCCGC

**Synthesis of AuNPs.** Synthesis of Au seeds. 100 mL of HAuCl<sub>4</sub> (1%) was heated at 80°C in a 250 mL three-necked round-bottomed flask under vigorous stirring. A solution of 1 mg/mL sodium citrate in Milli-Q water (50 mL) was heated to 80°C and then dropped into the three-necked round-bottomed flask quickly. Stirring continued for 2 h. The solution's final color was wine red.

Preparation of AuNPs. We diluted 2.5 mL Au seeds with 60 mL in Milli-Q water, and then mixed them with 10 mL growth solution (0.1% HAuCl<sub>4</sub>) with vigorous stirring. 0.64 mg/mL L-ascorbic acid solution (20 mL) and 5 mL Sodium citrate (8 mg/mL) were separately dropped into the mixture. Set the mixture for 2 hours

**TEM.** Morphology of AuNPs were characterized using transmission electron microscopy (TEM). AuNPs and were coated onto carbon-shadowed, formvar 246 coated grids, and examined with a transmission 248 electron microscope (JEM-2100F, Japan).

**Synthesis of 2S-branched primers.** 2S-branched DNA structure was synthesized in 80 mM NaCl by mix the equimolecular of corresponding oligonucleotide strands (Table 1). To be specific, 10  $\mu$ L Y<sub>a-S</sub> (100  $\mu$ M), 10  $\mu$ L Y<sub>b-S</sub> (100  $\mu$ M) and 10  $\mu$ L T7 RNAP-Y<sub>c</sub> or eGFP-Y<sub>c</sub> (100  $\mu$ M) were diluted in 80 mM NaCl aqueous solution to total volume of 100  $\mu$ L with a final concentration of 10  $\mu$ M for each oligonucleotide and, then annealed from 95°C to 20°C in less than 2 h. The procedures were performed as following: Denaturation at 95°C for 2 min; Cooling at 65°C for 2 min; Annealing at 60°C for 5.5 min; Further annealing at 60°C for 0.5 min with a continuous temperature decrease at a rate of 1°C per min. The final annealed products were stored at 20°C. The final concentration of synthesized 2S-branched DNA was 10  $\mu$ M. Then the synthesized samples were cross-linked being incubated with 4',5',8'-trimethypsoralen at a molar ratio of 1:1 between 4',5',8'-trimethypsoralen and DNA

base pair. The mixture was diluted with aqueous NaCl solution (40 mM) and exposed to UV light for cross-linking using a 365 nm UV-A lamp (Scientz03-II, SCIENTZ BIOTECHNOLOGYCO) of approximately 4.0 J on the ice. The thermostability of branched primers was confirmed with 8% Ready Gel TBE-urea polyacrylamide denaturing gel, and almost 100% 2S-branched DNA was cross-linked after crosslinking treatment.

**Melting curve analysis.** Melting curves were determined as our previous method<sup>1</sup>. In general, they were determined by measuring the ultraviolet absorption of 2.0  $\mu$ M 2S-branched DNA or 2S-branched primer at 260 nm with gradually heating up temperature from 25°C to 95°C. In particular, 2S-branched DNA or 2S-branched primer was diluted in aqueous NaCl solution (48 mM) with a final concentration of 2  $\mu$ M. 500  $\mu$ L sample was placed into the cuvette (45×12.5×4.5 mm), then the ultraviolet absorption of samples at 260 nm was measured every 2°C increase with heating up temperature from 25°C to 95°C by UV-VIS-NIR spectrometer (Shimadzu UV-3600, Japan)

**Preparation of *E. coli* BL21 extracts.** We prepared *E. coli* BL21 extracts based on our previously reported method<sup>2</sup>. *E. coli* BL21 strains initial cultivation was performed in 20 mL of LB medium (16 g/L tryptone, 10 g/L yeast extract, 5 g/L NaCl) at 37°C in an orbital shaker at 250 rpm. After 12 hours incubation, 2 mL of starter culture was used to inoculate 1 L fresh LB medium, which contained YTPG salts (2 mM NaH<sub>2</sub>PO<sub>4</sub>, 4 mM Na<sub>2</sub>HPO<sub>4</sub>) and 0.1 M glucose, and incubate on shaker (250 rpm) at 37°C. When the OD<sub>600</sub> of grow culture reached 1.8, collected the cell pellets by centrifugation with high speed refrigerated centrifuge (GL-21M, CENCE) at 5500 rpm and 4°C for 10 min. Pellets was thoroughly dissolved in ice-cold 20% sucrose solution and incubated on ice for 10 min. Resuspended cells were transferred to a weighed JA20 container and collected by centrifugation at 6800 rpm and 4°C for 10 min. Cell pellets were then washed four times with ice-cold MQ. After the final wash and centrifugation, the pelleted cells were resuspended in lysate buffer (10 mM Tris, 60 mM potassium glutamate, 14 mM magnesium glutamate, 1 mM DTT), and 1 g pellets were resuspended by 1.3 mL lysate buffer. The smooth suspended cells were shaken or knocked by hand and disrupted by Noise Isolating Chamber (SCIENTZ, China). The lysate was then centrifuged twice at 15700 rpm and 4°C for 30 min. The resultant supernatant was collected as cell lysate, and then immediately flashed frozen in liquid nitrogen and stored at -80°C.

**Equation S1:** Spatial distance between two genes in free gene circuit system

$$d = \sqrt[3]{\frac{1}{cN_A}}$$

Where  $c$  is the concentration of total genes,  $N_A$  is Avogadro's constant.

## Oligonucleotides

**Table S1.** Oligonucleotides used for synthesis of branched primers and PCR.

| Strand                 | Sequence                                                               | Use                                                                                                                                      |
|------------------------|------------------------------------------------------------------------|------------------------------------------------------------------------------------------------------------------------------------------|
| Y <sub>a-S</sub>       | 5'TGGACCGATATCATATGTACATTACTATAGTACCTGAGSH3'                           | Building blocks of branched primer. Aquamarine part is T7 RNAP reverse primers for PCR, and orange part is eGFP forward primers for PCR. |
| Y <sub>b-S</sub>       | 5' CTCAGGTACTATAGTAATGATCATCTATAGTACAGCCTSH3'                          |                                                                                                                                          |
| T7 RNAP-Y <sub>c</sub> | 5'AGGCTGTACTATAGATGATTACATATGATATCGGTCCATAG<br>CTCCTGAAAATCTCGCCAAGC3' |                                                                                                                                          |
| eGFP-Y <sub>c</sub>    | 5'AGGCTGTACTATAGATGATTACATATGATATCGGTCCATAA<br>CCGTATTACCGCCTTTGAGT3'  |                                                                                                                                          |
| T7 RNAP forward primer | 5'ATAGGGGTTCCGCGCACATTTCC3'                                            | Forward primer for PCR to generate 2S-T7 RNAP gene                                                                                       |
| eGFP reverse primer    | 5'GCGGGCCTCTTCGCTATTA3'                                                | Reverse primer for PCR to generate 2S-eGFP gene                                                                                          |



## RESULTS AND DISCUSSION

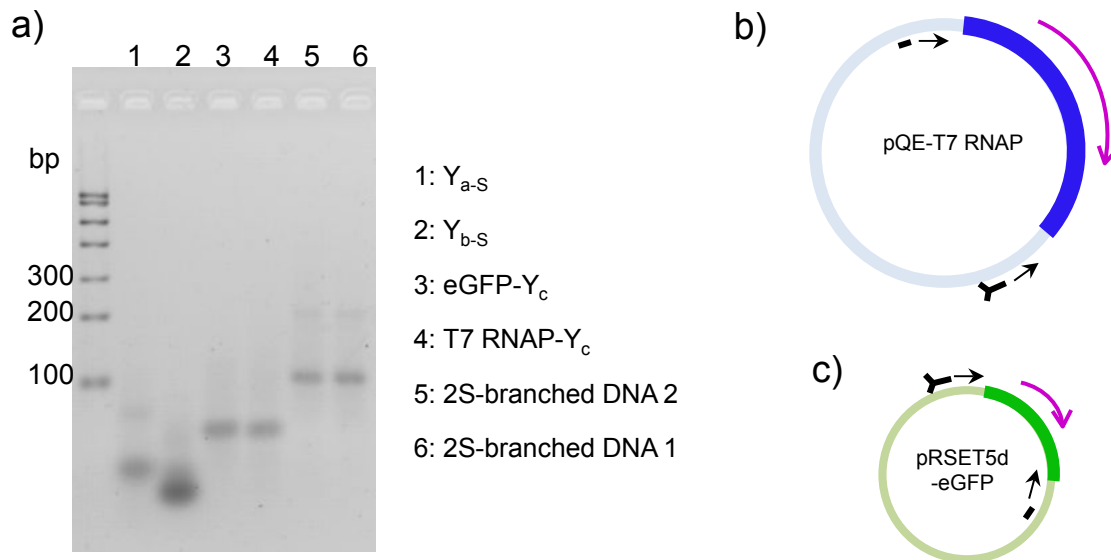

**Figure S1.** Verification of the formation of 2S-branched DNA and schemes of synthesizing 2S-genes from plasmids. (a) 3% agarose gel electrophoresis of ssDNA ( $Y_{a-S}$ ,  $Y_{b-S}$ , eGFP- $Y_c$  and T7 RNAP- $Y_c$ ) and 2S-branched DNA (2S-branched DNA 1 and 2S-branched DNA 2). (b) Scheme of synthesizing 2S-T7 RNAP gene from pQE-T7 RNAP plasmid by 2S-branched reverse primer and linear forward primer. (c) Scheme of synthesizing 2S-eGFP gene from pRset5d-eGFP plasmid by 2S-branched forward primer and linear reverse primer.

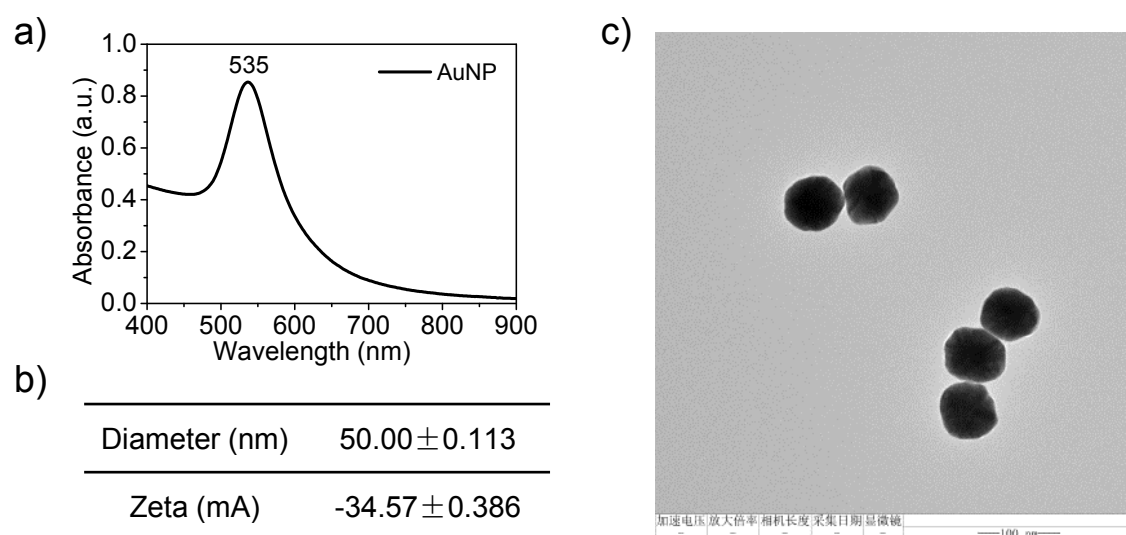

**Figure S2.** Characterizations of the synthesized AuNPs. (a) UV-Vis absorption spectrum of AuNPs. (b) Particle size and surface potential analysis of AuNPs. (c) TEM image of AuNPs.

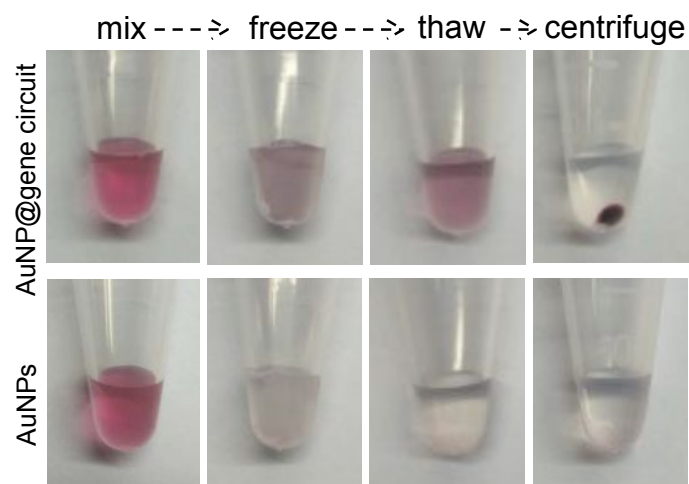

**Figure S3.** Synthesis of AuNP@gene circuit nanostructure using freezing method. Photographs showing the synthesis process of AuNP@gene circuit. The gene functionalized AuNPs were still red and well dispersed after freezing, and the sample easily precipitated after centrifugation. As control, free AuNPs freezing resulted in the colour change from red to colourless.

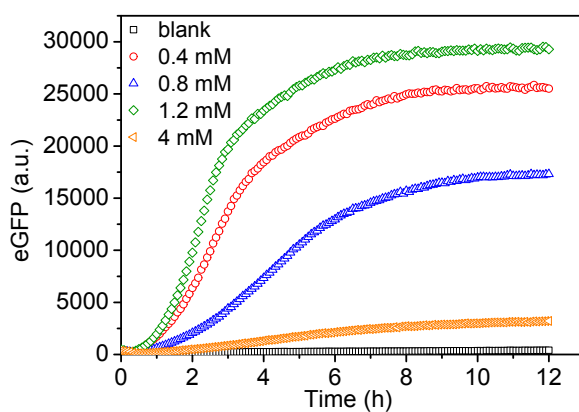

**Figure S4.** eGFP expression from free gene circuit with different concentrations of IPTG in cell-free system.

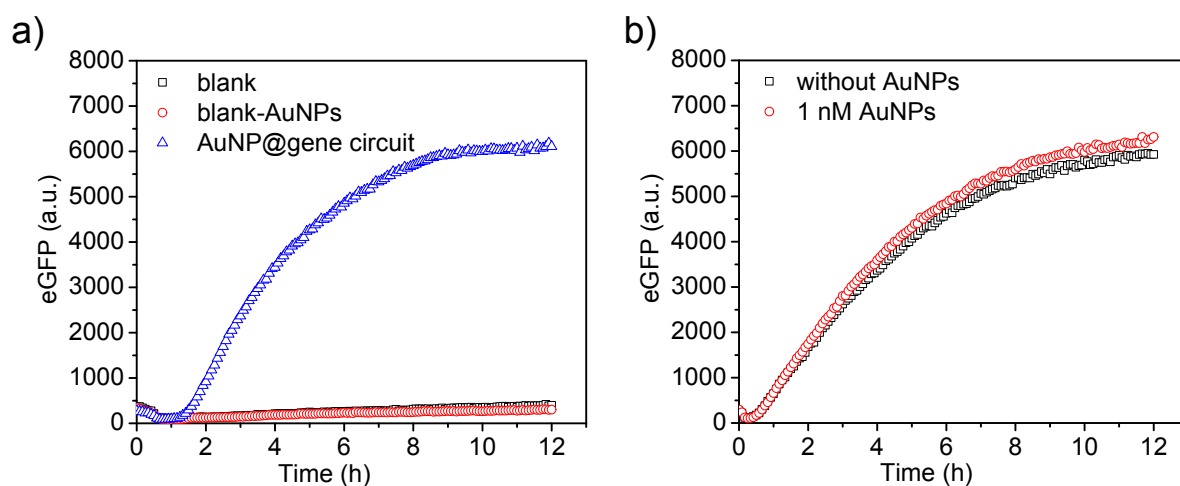

**Figure S5.** a) Free AuNPs have no influence in the background fluorescence value of cell-free system. b) 1 nM free AuNPs have no influence in protein expression of cell-free system.

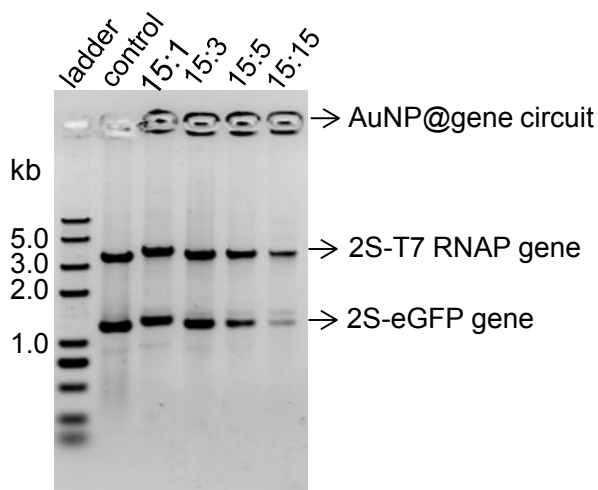

**Figure S6.** Agarose gel electrophoresis of AuNP@gene circuit with the stoichiometric ratio of 2S-eGFP genes to AuNPs varying from 15:1, 15:3, 15:5 to 15:15. The bounding efficiencies of genes in these four systems were 29.94%, 33.06%, 51.13% and 79.27%, respectively.

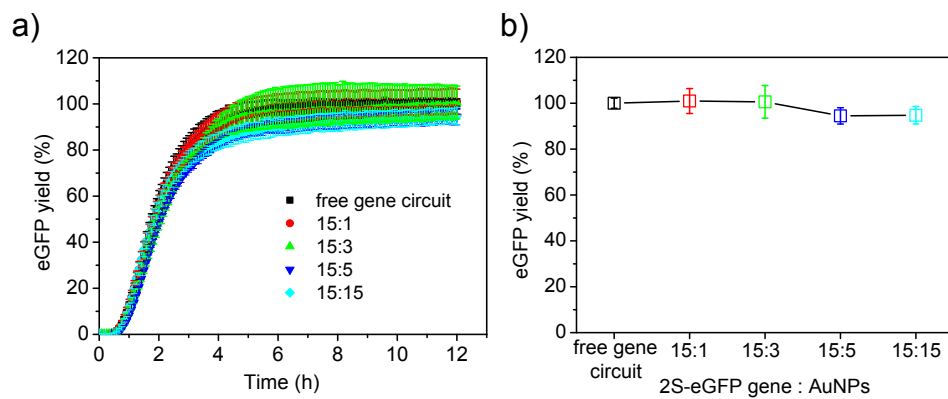

**Figure S7.** eGFP expression kinetics (a) and eGFP yields (b) with conjugating 2S-eGFP genes and 2S-T7 RNAP genes to AuNPs separately, and the stoichiometric ratios of 2S-eGFP genes (or 2S-T7 RNAP genes) to AuNPs were varied from 15:1, 15:3, 15:5 and 15:15. The concentrations of 2S-eGFP genes and 2S-T7 RNAP genes were 1 nM.

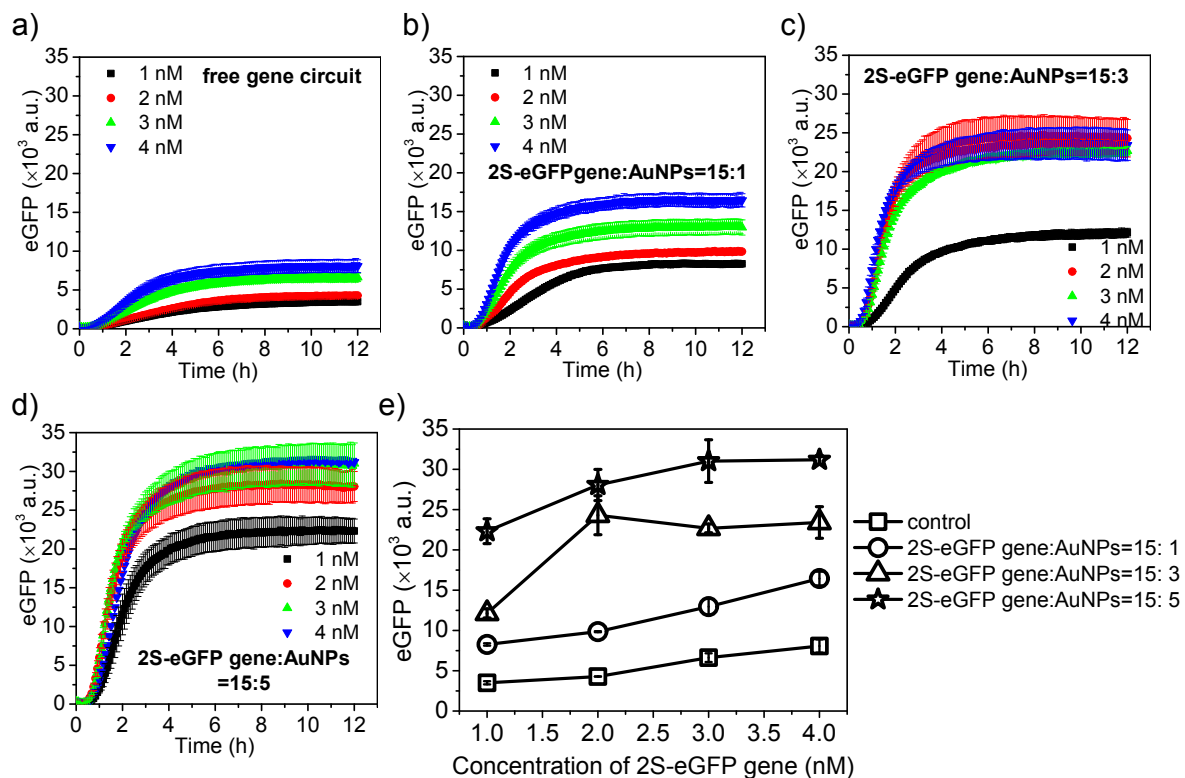

**Figure S8.** The effect of gene compartment on cascade gene expression with different concentration of genes. The eGFP expression with varying the concentration of 2S-eGFP gene (or 2S-T7 RNAP gene) from 1.0 to 4.0 nM in (a) free gene circuit system and (b-d) three gene compartment systems with the fixing the stoichiometric ratio of 2S-eGFP genes to AuNPs at (b) 15:1, (c) 15:3 and (d) 15:5, respectively. (e) eGFP yields in different gene compartment systems after expressing for 12 h. Error bars represent standard deviations from three replicates.

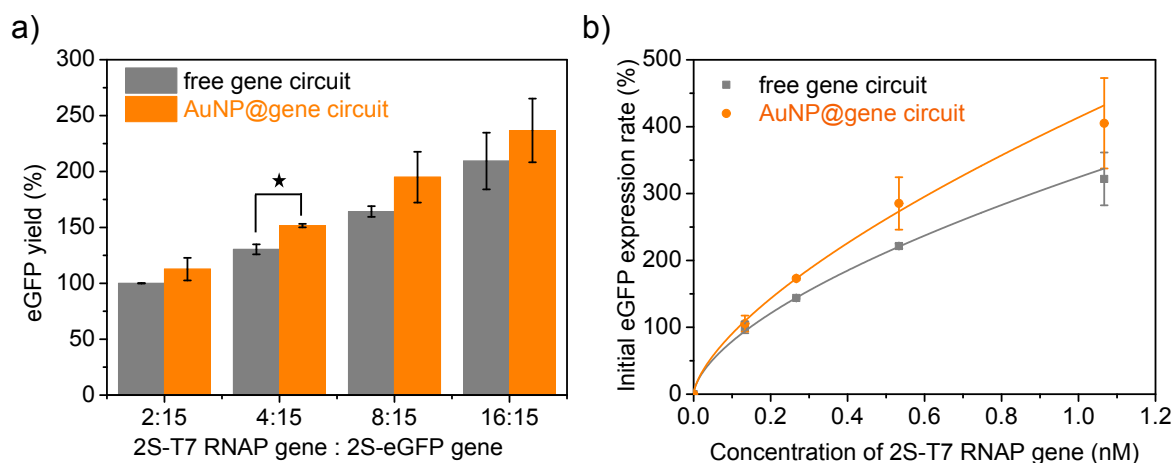

**Figure S9.** a) eGFP yield of different gene circuit compartment systems and free gene circuit systems with varying the stoichiometric of 2S-T7 RNAP genes to 2S-eGFP genes from 2:15, 4:15, 8:15, 15:15 to 16:15. The molar ratio of 2S-eGFP gene to AuNPs was set as 15:5, and the concentration of 2S-eGFP genes was kept at 1

nM. b). Experimental data (dots) and fitting curves (lines) of the initial eGFP expression rate as a function of the added concentration of 2S T7-RNAP genes. Error bars represent standard deviations from three replicates. ★:  $P < 0.05$ .

## REFERENCES

- (1) Guo, X.; Bai, L.; Li, F.; Huck, W. T. S.; Yang, D. Branched DNA architectures produced by pcr-based assembly as gene compartments for cell-free gene-expression reactions. *ChemBioChem* **2019**, *20*, 2597-2603.
- (2) Yang, D.; Peng, S.; Hartman, M. R.; Gupton-Campolongo, T.; Rice, E. J.; Chang, A. K.; Zi, G.; Lu, G. Q.; Dan, L. Enhanced transcription and translation in clay hydrogel and implications for early life evolution. *Sci. Rep.* **2013**, *3*, 3165-3170.
